# Supplementary material
Source: Springer Nature journal article supplement (https://www.springermedizin.de/resource/supplementary/12879_2004_166_MOESM2_ESM.pdf/9448324)
Supplement: MOESM2 [file 9448324]

|                              |                       |                                                                              |                                                                             |     |
|------------------------------|-----------------------|------------------------------------------------------------------------------|-----------------------------------------------------------------------------|-----|
| CACACCCGCACAGCTTTGAACTAGCATA | <b>ATG</b>            | AAGATCTGCAGCGTGCGTCCGCTTGT                                                   | <b>C</b> GTGTTGCTGGTGTGCGTCGCCGCGATGCTCGCACTCAGCGCCTCCGCTGAGCCGCACAAGGCAGCC | 124 |
| --CACCCGCACAGCTTTGAACTAGCATA | <b>ATG</b>            | AAGATCTGCAGCGTGCGTCCGCTTGT                                                   | <b>G</b> GTGTTGCTGGTGTGCGTCGCCGCGATGCTCGCACTCAGCGCCTCCGCTGAGCCGCACAAGGCAGCC | 122 |
| CCCCACGCACAACATTGACCGAGCACA  | <b>ATG</b>            | AAGATCCGCAGCGTGCGTCCGCTTGT                                                   | <b>G</b> GTGTTGCTGGTGTGCGTCGCGGCGGTGCTCGCACTCAGCGCCTCCGCTGAGCCGCACAAGGCGGCC | 124 |
| CCCCACGCACAACATTGACCGAGCACA  | <b>ATG</b>            | AAGATCCGCAGCGTGCGTCCGCTTGT                                                   | <b>G</b> GTGTTGCTGGTGTGCGTCGCGGCGGTGCTCGCACTCAGCGCCTCCGCTGAGCCGCACAAGGCGGCC | 124 |
| CCCCACGCACAACATTGACCGAGCACA  | <b>ATG</b>            | AAGATCCGCAGCGTGCGTCCGCTTGT                                                   | <b>G</b> GTGTTGCTGGTGTGCGTCGCGGCGGTGCTCGCACTCAGCGCCTCCGCTGAGCCGCACAAGGCGGCC | 124 |
|                              |                       |                                                                              |                                                                             |     |
| GTTGACGTCGGAACGCTCTCT        | -----                 | -----                                                                        | -----                                                                       | 145 |
| GTTGACGTCGGAACGCTCTCT        | -----                 | -----                                                                        | -----                                                                       | 143 |
| GTTGACGTCGGCCCGCTCTCT        | GTTGACGTTGGCCCGCTCTCT | -----                                                                        | GTTGGCCCGCAGTCC                                                             | 226 |
| GTTGACGTCGGCCCGCTCTCT        | GTTGACGTCGGCCCGCTCTCT | GTTGACGTTGGCCCGCTCTCC                                                        | GTTGGTCCGCAGTCT                                                             | 247 |
| GTTGACGCCGGCCCGCTCTCT        | GTTGACGTCGGCCCGCTCTCT | GTTGACGTTGGCCCGCTCTCC                                                        | GTTGGTCCGCAGTCT                                                             | 247 |
|                              |                       |                                                                              |                                                                             |     |
| -----                        | -----                 | -----                                                                        | GTGGCCTGCAGGCC                                                              | 160 |
| -----                        | -----                 | -----                                                                        | GTGGCCTGCAGGCC                                                              | 160 |
| -----                        | -----                 | -----                                                                        | GTTGGTCCGCAGTCC                                                             | 271 |
| -----                        | -----                 | GTTGACGTTGGCCCGCTCTCC                                                        | GTTGGTCCGCAGTCT                                                             | 313 |
| GTTGACGTTGGCCCGCTCTCC        | GTTGGTCCGCAGTCT       | GTTGGCCCGCTCTCT                                                              | GTTGACGTTGGCCCGCTCTCC                                                       | 364 |
|                              |                       |                                                                              |                                                                             |     |
| GTTGACGTTGGCCCGGTGTCG        | <b>TAA</b>            | GACTCGGCGTCCGCTTTCCGGCCTGCAGGAAAGCATGT                                       | --CATGGGGCATGGCGAAGCCTCGAACCTTGTCAGCAA                                      | 258 |
| GTTGACGTTGGCCCGGTGTCG        | <b>TAA</b>            | GACTCGGCGTCCGCTTTCCGGCCTGCAGGAAAGCATGT                                       | --CATGGGGCATGGCGAAGCCTCGAACCTTGTCAGCAA                                      | 256 |
| GTTGACGTTTCTCCGGTGTCT        | <b>TAA</b>            | GGCTCGGCGTCCGCTTTCCGGTGTGCGTAAAAGTATATGCCATGAGGCATGGTGACGAGGCAAACCTTGTCAGCAG |                                                                             | 371 |
| GTTGACGTTTCTCCGGTGGCT        | <b>TAA</b>            | GGCTCGGCGTCCGCTTTCCGGTGTGCGTAAAAGTATATGCCATGAGGCATGGTGACGAGGCAAACCTTGCCAGCAA |                                                                             | 413 |
| GTTGACGTTTCTCCGGTGTCT        | <b>TAA</b>            | GGCTCGGCGTCCGCTTTCCGGTGTGCGTAAAAGTATATGCCATGAGGCATGGTGACGAGGCAAACCTTGTCAGCAG |                                                                             | 464 |
